# Supplementary material for: A novel amphiphilic fluorescent probe BODIPY–O-CMC–cRGD as a biomarker and nanoparticle vector
Source: Royal Society of Chemistry journal article supplement (doi:10.1039/c8ra02125b), 2018-01-01
Supplement: c8ra02125b1.pdf [file c8ra02125b1.pdf]

## 2 Supporting Information

### 3 A novel amphiphilic fluorescent probe BODIPY—O-CMC—cRGD as 4 nanoparticle vector

5 Tingting Zhu<sup>a</sup>, Ji Xiong<sup>a</sup>, Zhongbo Xue<sup>a</sup>, Yu Su, Fengnan Sun<sup>a</sup>, Ran Chai<sup>c,d</sup>, Jialiang Xu<sup>a</sup>, Yaqing Feng<sup>a,b</sup>, Shuxian  
6 Meng<sup>a\*</sup>

#### Experiment:

##### Synthesis

#### Compound 1: ethyl 6-(4-formylphenoxy) hexanoate

A mixture of 4-hydroxybenzaldehyde derivative (2.440 g, 20 mmol) and ethyl 6-bromohexanoate (4.906 g, 22 mmol) was refluxed in dry acetone for 12 h in the presence of potassium carbonate. The crude mixture was filtered to remove remaining K<sub>2</sub>CO<sub>3</sub>. And the resulting solution was concentrated in vacuo and purified by silica gel column chromatography by using CH<sub>2</sub>Cl<sub>2</sub>/hexane. <sup>1</sup>H NMR (400MHz, CDCl<sub>3</sub> δ in ppm): δ=9.87(s,1H), 7.82(d, J=8.8, 2H), 6.98(d, J=8.6, 2H), 4.13(q, J=7.1 Hz, 2H), 4.05(t, J=6.4 Hz, 2H), 2.32(t, J=7.5, 2H), 1.84(m, 2H), 1.72(m, 2H), 1.52(m, 2H), 1.27(t, J=7.0, 3H). MALDI-TOF MS calcd for C<sub>15</sub>H<sub>20</sub>O<sub>4</sub> 264.32, found 264.7892.

#### Compound 2: ethyl 6-(4-(3,7-dibromo-5,5-difluoro-5H-4l4,5l4-dipyrrolo[1,2-c:2',1'-f][1,3,2]diazaborinin-10-yl)phenoxy)hexanoate

This compound was prepared in a sequence of steps in one pot reaction. Compound 1 (2.640 g, 10 mmol) and 2.5 equivalent of pyrrole (1.68 g, 25 mmol) was dissolved in dry CH<sub>2</sub>Cl<sub>2</sub> under nitrogen over 0.5 h, then one drop of CF<sub>3</sub>COOH was added and the solution was stirred for 1.5 h at room temperature. A simple base wash followed by removal of the solvent and vacuum desiccation gave dipyrromethene. The intermediate in dry THF was added dropwise with 2.2 equivalent of N-bromosuccinimide (3.89 g, 22 mmol) in dry THF under nitrogen in an ice bath over 1 h and stirred for another 1 h. When the reaction mixture was warmed to room temperature, 2,3-Dichloro-5,6-dicyano-1,4-benzoquinone (DDQ) (2.50 g, 11 mmol) in dry THF was added dropwise over 10 min. The reaction was monitored by TLC. The organic solvent was removed on a rotary evaporator under vacuum. The crude intermediate product was purified by flash column chromatography using CH<sub>2</sub>Cl<sub>2</sub> to collect the red intermediate product. A solution of collected intermediate product and triethylamine (2 ml) in dried toluene were stirred about 5 min, then 6 mL of BF<sub>3</sub>·Et<sub>2</sub>O was added dropwise. The mixed solution was refluxed for an 1 h. The reaction mixture was washed with 0.1 M NaOH solution and methylene dichloride successively. The organic layers were dried over MgSO<sub>4</sub> and concentrated in vacuo. The crude compound was filtered by flash column. The residue was purified by silica gel column chromatography by using dichloromethane/petroleum ether and the required red powder compound. <sup>1</sup>H NMR (400 MHz, DMSO-d<sub>6</sub>, δ in ppm) δ=7.73(d,

J=8.8Hz, 2H), 7.68(d, J=8.8Hz, 2H), 7.28(d, J=4.4, 2H), 6.72(d, J=4.4, 2H), 4.09(d, J=2.6Hz, 2H), 4.03(d, J=2.8, 3H), 2.00(d, J=7.7Hz, 2H), 1.34(d, J=7.4Hz, 2H) 1.06(t, J=7.0Hz, 3H), 1.41(d, J=7.2Hz, 2H). MALDI-TOF MS calcd for C<sub>23</sub>H<sub>23</sub>BBF<sub>2</sub>F<sub>2</sub>N<sub>2</sub>O<sub>3</sub> 582.01, found 583.2376.

#### Compound 3: ethyl 6-(4-(5,5-difluoro-3,7-bis(4-methoxyphenyl)-5H-4l4,5l4-dipyrrolo[1,2-c:2',1'-f][1,3,2]diazaborinin-10-yl)phenoxy)hexanoate

Compound 2, 4-methoxyphenylboronic acid (2.9 g, 5 mmol), and K<sub>2</sub>CO<sub>3</sub> (1.38 g, 10 mmol) was dissolved in the solvent pair (toluene/water) in a 100 ml round-bottomed flask fitted with a reflux condenser. After bubbling with nitrogen for half an hour, a catalytic amount of Pd(PPh<sub>3</sub>)Cl<sub>2</sub> (3.5 mg) was added and the reaction mixture was refluxed at 80 °C for 8 h. The system was cooled to room temperature and then extracted with CH<sub>2</sub>Cl<sub>2</sub>/H<sub>2</sub>O twice. The organic layer was then dried with MgSO<sub>4</sub> and evaporated in vacuum. The residue was subjected to chromatography on a silica gel by using dichloromethane/hexane. <sup>1</sup>H NMR (400MHz, CDCl<sub>3</sub> δ in ppm): δ=7.90 (d, J=8.7Hz, 4H), 7.46(d, J=2.4Hz, 2H), 6.88(d, J=8.7Hz, 4H), 6.78(d, J=4.0 Hz, 2H), 6.62(d, J=4.4Hz, 2H), 6.53(d, J=4.3Hz, 2H), 4.10(q, J=7.5Hz, 2H), 4.04(t, J=7.4, 2H), 3.81(s, 6H), 1.62(m, 2H), 1.53(m, 2H), 1.30(m, 2H). MALDI-TOF MS calcd for C<sub>37</sub>H<sub>37</sub>BF<sub>2</sub>N<sub>2</sub>O<sub>5</sub> 638.28, found 638.2170.

#### Compound 4: ethyl 6-(4-(5,5-difluoro-3,7-bis(4-methoxyphenyl)-5H-4l4,5l4-dipyrrolo[1,2-c:2',1'-f][1,3,2]diazaborinin-10-yl)phenoxy)hexanoate

The compound 3 (1.276 g, 2 mmol) and KOH (4.704 g, 84 mmol) were dissolved in EtOH (59 ml) and the mixture solution was refluxed at 85 °C for 1h. After cooling to the room temperature, the mixture product was neutralized with dilute HCl, extracted with CH<sub>2</sub>Cl<sub>2</sub> and dried with Na<sub>2</sub>SO<sub>4</sub>. The crude compound was purification by chromatography on a silica gel by using ethyl acetate/ methylene dichloride. <sup>1</sup>H NMR (400MHz, CDCl<sub>3</sub> δ in ppm): δ=7.87 (d, J = 8.9 Hz, 4H), 7.51 (d, J = 4.1 Hz, 2H), 7.04 (d, J = 7.1 Hz, 1H), 6.83 (d, J = 2.1 Hz, 1H), 6.61 (d, J = 4.4 Hz, 2H), 6.95 (d, J = 8.9 Hz, 4H), 4.07 (t, J = 6.2 Hz, 1H), 3.85 (s, 6H), 2.26(t, J=7, 2H), 1.80-1.20(m, 6H). MALDI-TOF MS calcd for C<sub>35</sub>H<sub>33</sub>BF<sub>2</sub>N<sub>2</sub>O<sub>5</sub> 610.25, found 611.7846.

#### BODIPY dye: 2,5-dioxopyrrolidin-1-yl 6-(4-(5,5-difluoro-3,7-bis(4-methoxyphenyl)-5H-4l4,5l4-dipyrrolo[1,2-c:2',1'-f][1,3,2]diazaborinin-10-yl)phenoxy)hexanoate

The compound 4 (0.61 g, 1 mmol), N-hydroxysuccinimide(0.23 g, 2 mmol), dimethylaminopyridine(DMAP) (0.244 g, 2 mmol) and 1-(3-dimethylaminopropyl)-3-ethylcarbodiimide (0.382 g, 2 mmol) were dissolved in dry dichloromethane at 35°C for 2 h. After that, the mixture was washed with 2 × 10 mL of water, the organic phase was dried with MgSO<sub>4</sub> and evaporated in vacuum. The crude product was purified by chromatography on silica gel by using dichloromethane/hexane.<sup>1</sup>H NMR (400MHz, CDCl<sub>3</sub>, δ in ppm) : 7.87(d,J=5.2Hz,4H),7.07(d,J=2.4,2H),7.52(d,J=2.4,2H),6.97(d,J=8Hz,4 H;Ar), 6.6(d, J=4.4, 2H), 4.10(t, J=3.85), 6.88(d, J=4.6, 2H), 3.80 (s,6H), 4.10(t, J=9.2,2H), 3.98(t, J=2.5,2H), 2.68(s,2H), 2.58(s,2H) , 2.33(s, 2H),1.78-1.55 (m, 6H).MALDI-TOF MS calcd for C<sub>39</sub>H<sub>36</sub>BF<sub>2</sub>N<sub>3</sub>O<sub>7</sub> 707.54, found 707.8739.
